# Supplementary material for: Acute Inflammation Is a Predisposing Factor for Weight Gain and Insulin Resistance
Source: MDPI journal article supplement (doi:10.3390/pharmaceutics14030623), 2022-03-11
Supplement: s1 [file s1]

**Figure S1**

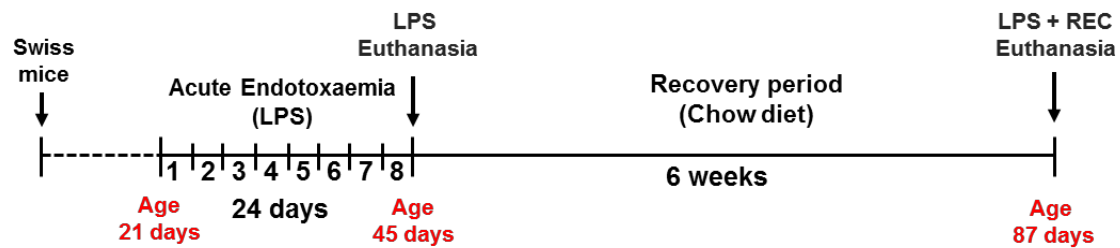

**Figure S1a. Acute endotoxemia followed by recovery period under chow diet (LPS + REC).** The method of multiple inductions of acute endotoxemia comprises intraperitoneal administration of 8 consecutive injections (every 3 days) of LPS 10 mg/kg (Lipopolysaccharides from *Escherichia coli* 026:B6, Sigma-Aldrich®, St. Louis, MO, USA), in saline (NaCl 0,9%), starting at weaning (21 days of age) with end at 45 days of age of the animal, followed by a recovery period of 6 weeks under chow diet. For acute endotoxemia experiments, mice were randomly assigned into 2 different groups: the Control group and the LPS group, with euthanasia occurring after the last acute phase period or after 6 weeks from the last acute phase induction (recovery period).

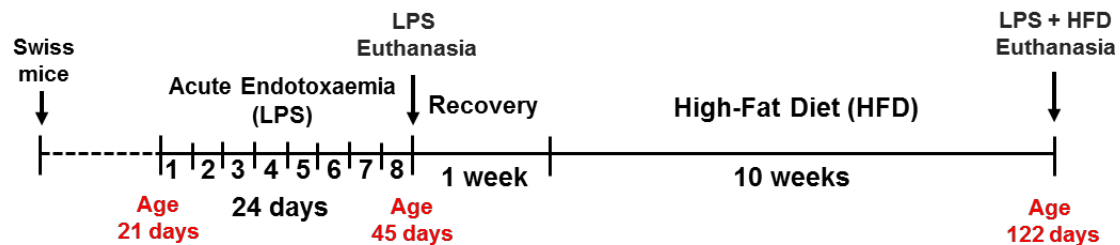

**Figure S1b. Acute endotoxemia followed by High-Fat Diet (HFD) (LPS + HFD).** For acute endotoxemia followed by 10 weeks on a high-fat diet (LPS+HFD) experiments, the animals were randomly assigned into 2 different groups: HFD group and LPS+HFD group. The HFD mice were submitted to a HFD for 10 weeks starting concurrently with the LPS+HFD group. The LPS+HFD mice were underwent to multiple inductions of acute endotoxemia followed by 1 week of recovery period in standard chow diet plus 10 weeks on a HFD.

**Figure S2**

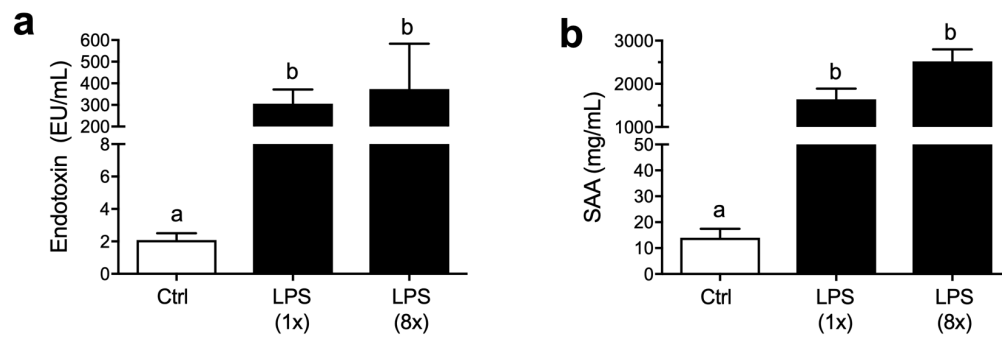

**Figure S2. Serum endotoxin and SAA levels after LPS challenges.** Swiss Webster mice were submitted to intraperitoneal administration of 8 consecutive doses of 10 mg/kg LPS, every 3 days. **(a)** Endotoxin and **(b)** SAA concentration in serum. For all variables with the same letter, the difference between the means is not statistically significant. Where two variables have different letters, they are significantly different ( $p < 0.05$ ). Data are means  $\pm$  SEM from 6 mice per group.

**Table S1.** SAA profile during acute endotoxemia

| Time<br>(hours) | SAA (µg/mL)      |                   |
|-----------------|------------------|-------------------|
|                 | Control<br>group | LPS<br>group      |
| 0 h             | 16.8 ± 8.2       | 15.4 ± 6.8        |
| 6 h             | 21.7 ± 6.8       | 986.4 ± 75.8***   |
| 12 h            | 25.4 ± 13.5      | 1527.0 ± 193.6*** |
| 24 h            | 18.2 ± 10.7      | 888.4 ± 141.0**   |
| 48 h            | 7.1 ± 2.3        | 125.4 ± 40.1**    |
| 72 h            | 17.5 ± 8.7       | 29.6 ± 11.7       |

Data are means ± SD from 3 mice per group  
(\*\* $p < 0.01$ , \*\*\* $p < 0.001$ , between groups, as indicated)

**Table S1.** SAA profile during acute endotoxemia. SAA was quantified in serum after 6, 12, 24, 48 and 72 hours of LPS-treatment (10 mg/kg).

**Table S2.** Experimental diet composition

| Ingredients (g/Kg)                  | Chow diet <sup>a</sup><br>16.7 kJ/g | High-fat diet<br>23.2 kJ/g |
|-------------------------------------|-------------------------------------|----------------------------|
| Sucrose                             | 100                                 | 133.56                     |
| Casein                              | 120                                 | 186.98                     |
| Corn oil                            | 80                                  | 53.42                      |
| Lard                                | -                                   | 300                        |
| Cellulose                           | 50                                  | 66.78                      |
| Mineral Mix (Rhoster <sup>®</sup> ) | 35                                  | 46.74                      |
| Vitamin Mix (Rhoster <sup>®</sup> ) | 10                                  | 13.36                      |
| DL-Methionine <sup>b</sup>          | 1.8                                 | 2.4                        |
| Choline Bitartrate                  | 2.5                                 | 3.34                       |
| Tert-butylhydroquinone              | 0.01                                | 0.04                       |
| Corn starch                         | 600.69                              | 193.38                     |

<sup>a</sup>According to AIN-93M.

<sup>b</sup>2-amino-4-methylsulfanylbutoic acid.

**Table S3.** Oligos used in all quantitative PCR assays

| Primer<br>(gene / protein)      | Forward                             | Reverse                             |
|---------------------------------|-------------------------------------|-------------------------------------|
| <i>Saa1.1/2.1</i> (SAA1 / SAA2) | 5'-AGA CAA ATA CTT CCA TGC TCG G-3' | 5'-CAT CAC TGA TTT TCT CAG CAG C-3' |
| <i>Tlr2</i> (TLR-2)             | 5'-CAG CTG GAG AAC TCT GAC CC-3'    | 5'-CAA AGA GCC TGA AGT GGG AG-3'    |
| <i>Tlr4</i> (TLR-4)             | 5'-TCA TGG CAC TGT TCT TCT CCT-3'   | 5'-CAT CAG GGA CTT TGC TGA GTT-3'   |
| <i>Cd14</i> (CD14)              | 5'-GCG AGC TAG ACG AGG AAA GT-3'    | 5'-CAC GCT TTA GAA GGT ATT CCA G-3' |
| <i>Gapdh</i> (GAPDH)            | 5'-TGG CAA AGT GGA GAT TGT TGC C-3' | 5'-AAG ATG GTG ATG GGC TTC CCG-3'   |
